# Supplementary material for: Construction of a graphene/cellulose aerogel embedded with UiO-66-CN for highly efficient uranium capture via electro-adsorption
Source: Royal Society of Chemistry journal article supplement (doi:10.1039/d4ta07988d), 2025-01-01
Supplement: d4ta07988d1.pdf [file d4ta07988d1.pdf]

## Supporting Information

### **Construction of graphene/cellulose aerogel embedded with UiO-66-CN for highly efficient uranium capture via electro-adsorption**

*Jinhao Tian,<sup>ab</sup> Nan Li,<sup>\*a</sup> Yu Luo,<sup>ab</sup> Hao Xing,<sup>a</sup> Ruidian Su<sup>c</sup> and Lei Wang<sup>\*a</sup>*

- a. Key Laboratory of Eco-chemical Engineering, International Science and Technology Cooperation Base of Eco-chemical Engineering and Green Manufacturing, College of Environment and Safety Engineering, Qingdao University of Science and Technology, Qingdao 266042, P. R. China
- b. College of Chemistry and Molecular Engineering, Qingdao University of Science and Technology, Qingdao 266042, P. R. China.
- c. College of Environmental Science and Engineering, Ocean University of China, Qingdao 266100, P. R. China

\* Corresponding author.

E-mail addresses: [linanhhh@qust.edu.cn](mailto:linanhhh@qust.edu.cn) (N. Li), [inorchem@126.com](mailto:inorchem@126.com) (L. Wang).

## Characterization

The microstructure of different materials was observed via a scanning electron microscope (SEM, Regulus8100, Hitachi, Japan) and a surface area analyzer (BET, ASAP2460, Micromeritics, USA). Energy dispersive spectroscopy (EDS) analysis was performed by using SEM (Regulus 8100, Hitachi, Japan) with a BRUKER XFlash 6160 detector. The crystalline characteristics of different materials were analyzed by X-ray diffraction (XRD) on a diffractometer equipment (D-MAX 2500/PC, Rigaku, Japan). Material surface chemistry was investigated by Fourier transform infrared spectroscopy (FTIR, Nicolet iS20, Thermo Fisher Scientific, USA) and X-ray photoelectron spectroscopy (XPS, ESCALAB 250Xi, Thermo Scientific, USA). The TGA curves were analyzed using a thermogravimetric analyzer (TGA, STA 449 F5 Jupiter, NETZSCH, Germany) at a heating rate of 2°C min<sup>-1</sup> from 35 to 800°C under N<sub>2</sub> atmosphere. The concentrations of metal ions in actual water sources and simulated water were examined by inductively coupled plasma mass spectrometry (ICP-MS, 7700ICP-MS, Agilent, USA). The electrochemical performance of different electrodes was carried out by an electrochemical workstation (CHI660E Shanghai Chenhua Instrument Co., China).

## Electrochemical properties.

The specific capacitance of different electrode at different scan rates was calculated from equation (1)

$$C = \frac{\int I dV}{2mv\Delta V} \quad (1)$$

where  $C$  (F/g) is the specific capacitance,  $I$  (A) represents current density,  $v$  (V/s) refers

to scanning rate,  $m$  (g) is adsorbent weight.

The contribution ratios of the capacitive process is calculated by equation (2)

$$i(v) = k_1v + k_2v^{1/2} \quad (2)$$

where  $k_1$  and  $k_2$  are constants.

### Adsorption experimental procedure

$\text{UO}_2(\text{NO}_3)_2 \cdot 6\text{H}_2\text{O}$  was dissolved in deionized water to obtain U(VI) solutions. In electrosorption tests, a power supply unit (MS-152D, Maisheng, China) was used to provide an applied voltage. The adsorption experiments were carried out in a 50 mL solution using a three-electrode system, where a platinum plate was the counter electrode and Ag/AgCl was the reference electrode (Fig. S2). During the physicochemical adsorption, a desired amount of various materials was dosed in U(VI) solution and shaken on a shaking incubator (SHY-2A, XIUILAB, China) at the speed of 160 rpm. When the electro-/physicochemical adsorption ended, the samples were collected using 0.22  $\mu\text{m}$  filters. The concentrations of U(VI) in various solutions were determined by a UV-visible spectrophotometer (UV-8000, METASH, China). The uranium electrosorption capacity and physicochemical adsorption capacity were calculated using equation (3)-(4).

$$q_e = \frac{(C_0 - C_e) \times V_s}{m} - q_{e, \text{Nafion}} \quad (3)$$

$$q_{e, \text{Nafion}} = \frac{(C_0 - C_N) \times V_s}{m_{(\text{carbon paper} + \text{Nafion})}} \quad (4)$$

Where  $q_e$  (mg/g) is the electro-/physicochemical adsorption capacity of materials and  $q_{e, \text{Nafion}}$  (mg/g) is the electro-adsorption capacity of the Nafion electrode. In physicochemical adsorption experiments,  $q_{e, \text{Nafion}}$  is 0.  $C_0$  (mg/L) refers to the beginning

concentration of U(VI) solution.  $C_e$  (mg/L) and  $C_N$  (mg/L) represent the concentration of U(VI) after electro-adsorption on UiO-66-CN/GCA and pristine Nafion electrodes.  $V_s$  (L) means the solution volume.  $m$  and  $m_{(\text{carbon paper+Nafion})}$  denote the mass of adsorbents and carbon paper coated Nafion, respectively.

The adsorption kinetics of uranium were evaluated by the following kinetic models.

Pseudo-first-order rate model:

$$\ln(q_e - q_t) = \ln q_e - k_1 t \quad (5)$$

Pseudo-second-order rate model:

$$\frac{t}{q_t} = \frac{t}{q_e} + \frac{1}{(k_2 q_e)^2} \quad (6)$$

Where  $q_t$  signifies the adsorption performance at time ( $t$ ).  $k_1$  and  $k_2$  are the constants associated with the rates.

The data of adsorption isotherm experiments were fitted by the following equations.

Langmuir isotherm:

$$q_e = \frac{K_L \cdot q_{max} \cdot C_e}{1 + K_L \cdot C_e} \quad (7)$$

Freundlich isotherm:

$$q_e = K_f C_e^{1/n} \quad (8)$$

Where  $q_{max}$  (mg/g) is the saturated adsorption capacity of U(VI).  $K_L$ ,  $K_f$  and  $1/n$  are constants.

where  $k_1$  and  $k_2$  are constants.

### **Effect of UiO-66-CN/GCA mass on U(VI) adsorption**

The quantity of UiO-66-CN/GCA coated to the carbon paper is a critical aspect that significantly impacts the electrosorption effectiveness of the electrode. Fig. S3

illustrates the electrosorption ability of different electrodes at a voltage of 1 V. The electrosorption capacity exhibits an initial rise followed by a subsequent decrease as the mass of UiO-66-CN/GCA on the electrode grows. The rise in the mass of UiO-66-CN/GCA causes the coating on the electrodes to become thicker, which in turn contributes to a steady decline in the utilization of the active sites. The electrode containing 0.2 mg of UiO-66-CN/GCA achieves the highest uranium electrosorption capacity, which is selected for subsequent studies.

### **Reusability assay**

Electro-adsorption/desorption cycle experiments of UiO-66-CN/GCA electrodes were performed to evaluate their stability and reusability. In each cycle, after electro-adsorbing in 100 mg/L uranium solution at 1.2 V for 2 h, the UiO-66-CN/GCA electrode was regenerated in different eluents (1 M NaCl, 0.5 M Na<sub>2</sub>CO<sub>3</sub>, 1 M Na<sub>2</sub>CO<sub>3</sub>) with a reverse voltage of 1.2 V for 2 h. The desorbed electrodes were gently rinsed with water and then air-dried for the subsequent cycle.

### **Selectivity tests**

Uranium selectivity of UiO-66-CN/GCA was tested via both physicochemical adsorption and electrosorption in simulated solutions containing UO<sub>2</sub><sup>2+</sup>, VO<sub>3</sub><sup>-</sup>, Ba<sup>2+</sup>, Ca<sup>2+</sup>, Cu<sup>2+</sup>, Mg<sup>2+</sup>, Na<sup>+</sup>. The concentration of each ion before and after adsorption was determined by ICP-MS. The selectivity of UiO-66-CN/GCA for uranium was evaluated as follows:

$$K_{d(M)} = q_e / C_e \quad (9)$$

$$\alpha_M = K_{d(U)} / K_{d(M)} \quad (10)$$

where  $K_{d(M)}$  refers to the distribution coefficient,  $\alpha_M$  is the selectivity coefficient, and  $M$  represents metal ions.

### **DFT calculation**

To investigate the enhancing impact of the electric field on uranium adsorption by UiO-66-CN/GCA, molecular dynamics simulations were performed with the GROMACS software, employing the GAFF.<sup>1</sup> The water molecules were described with the TIP3P mode and the initial model was constructed (Fig. S4). An electric field of 0.5 V/nm was applied along the z-axis and a 1000 ps NVT simulation was subsequently conducted. The simulations maintained a constant temperature of 298 K using the V-rescale thermostat approach,<sup>2</sup> with a cutoff distance of 1.2 nm.<sup>3</sup> The LINCS algorithm was employed to constrain bonds involving hydrogen atoms with a time step of 2 fs.<sup>4</sup> Long-range electrostatics were computed via the Particle Mesh Ewald (PME) method and visualization of the trajectory was generated using the VMD software.<sup>5</sup>

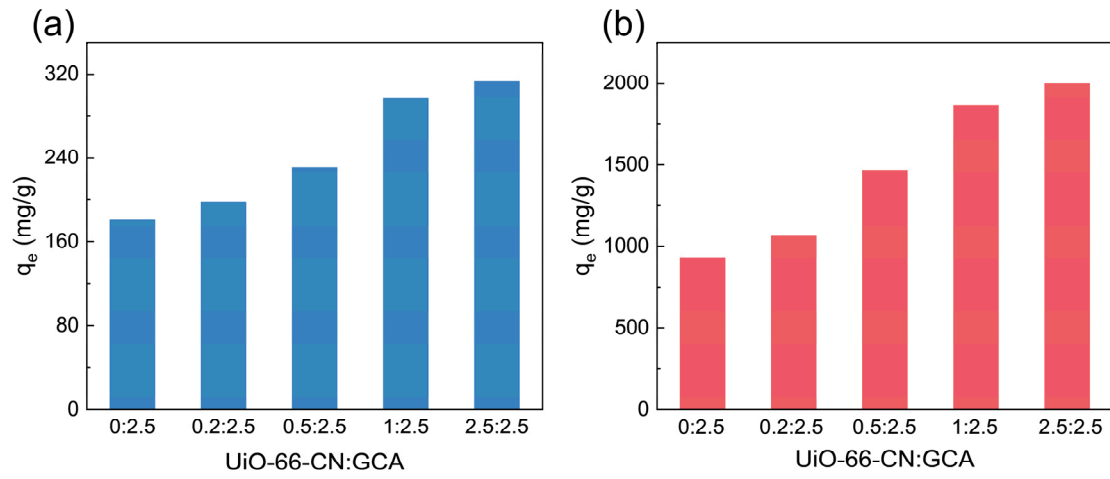

**Figure S1.** (a) Physicochemical adsorption and (b) electrosorption of UiO-66-CN/GCAs with different ratios.

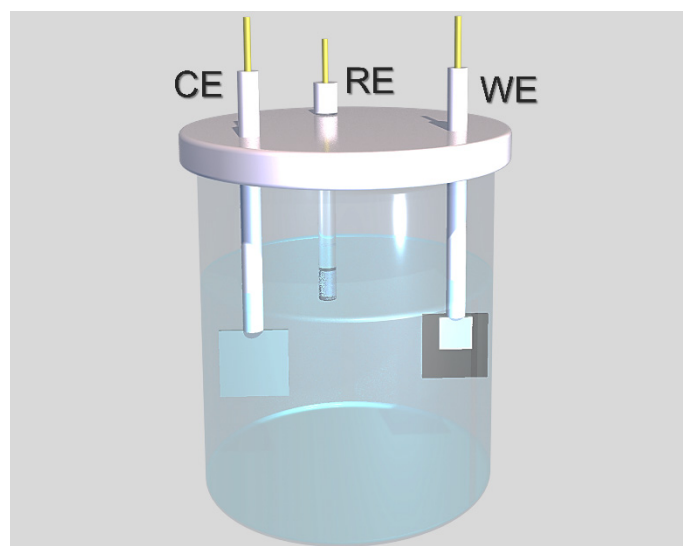

**Figure S2.** Three-electrode system (WE: UiO-66-CN/GCA, RE: Ag/AgCl, CE: Pt).



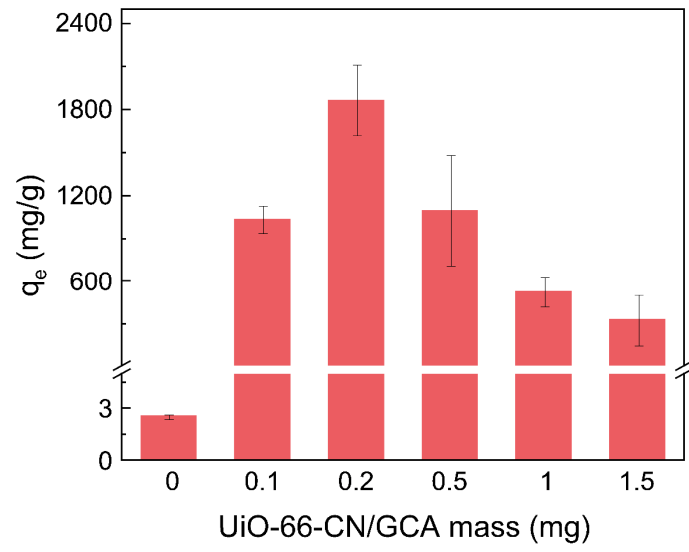

**Figure S3.** Electro-adsorption performance of electrodes with different masses of UiO-66-CN/GCA.

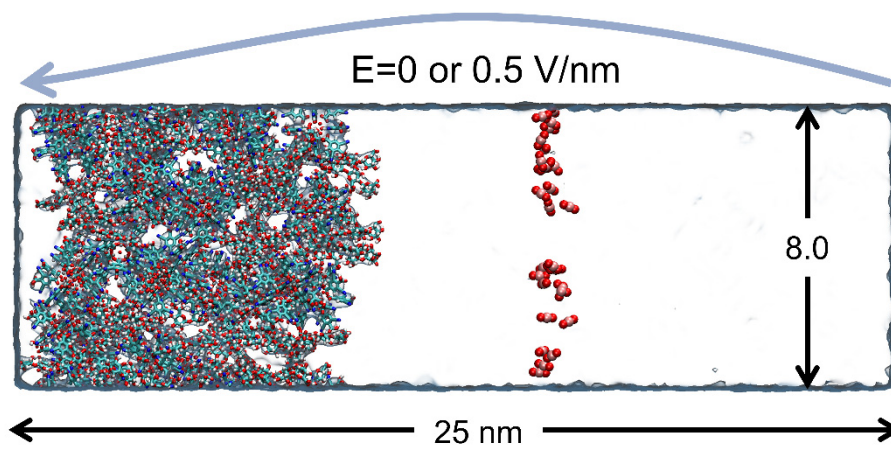

**Figure S4.** Construction of initial molecular dynamics model.

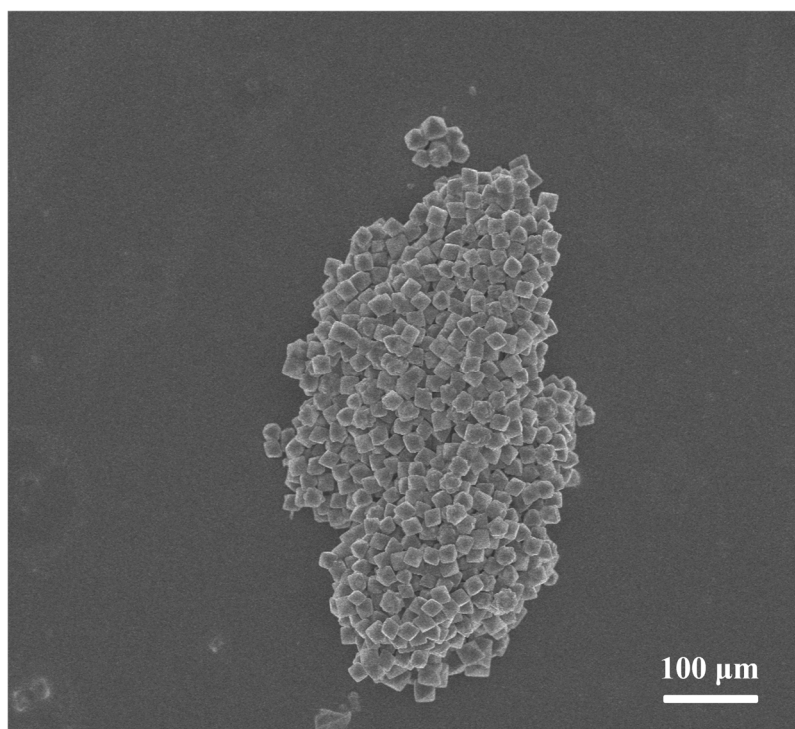

**Figure S5.** SEM image of UiO-66-CN.

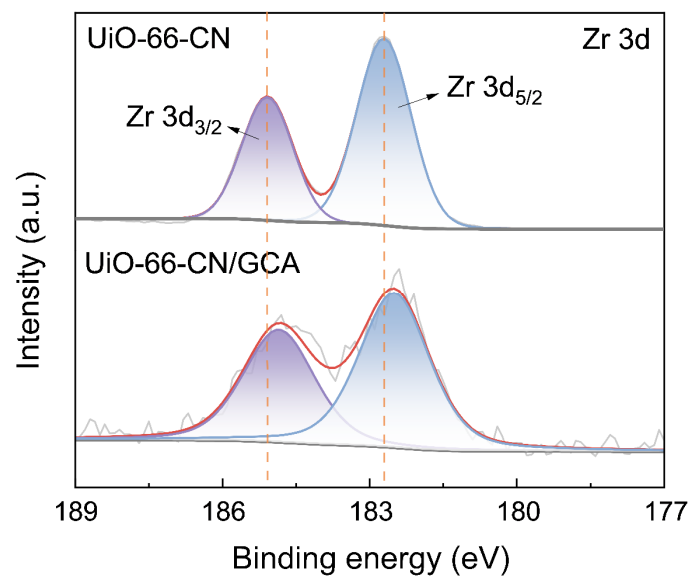

**Figure S6.** XPS spectra of Zr 3d for UiO-66-CN and UiO-66-CN/GCA.

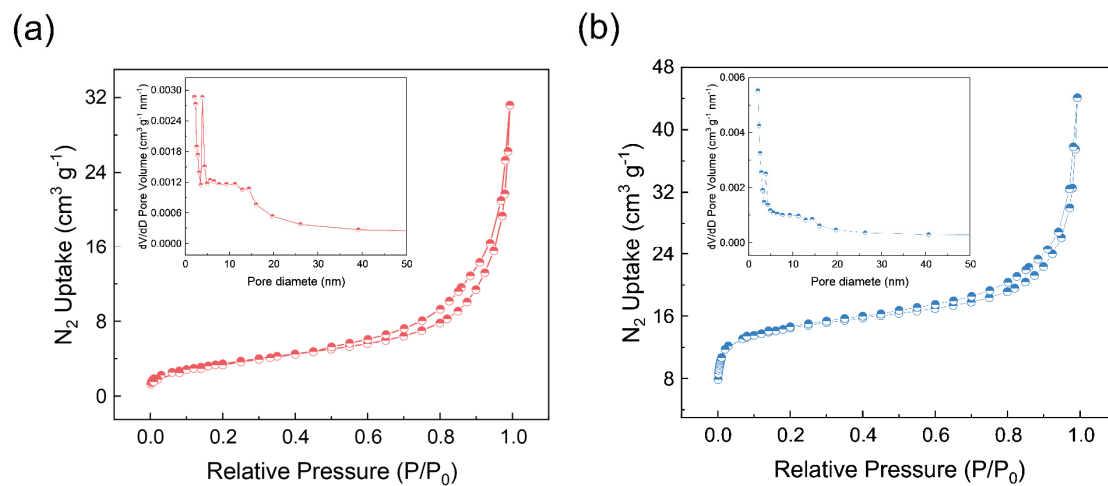

**Figure S7.** The  $N_2$  adsorption/desorption isotherms and pore size distribution of (a) GCA and (b) UiO-66-CN/GCA.

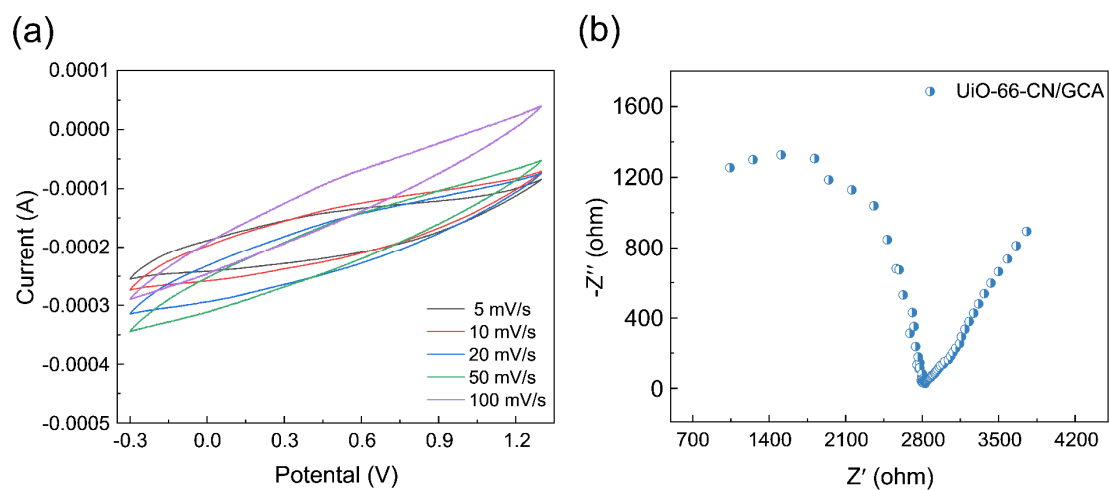

**Figure S8.** (a) CV curves and (b) Nyquist plots of UiO-66-CN/GCA in a three-electrode system using 100 mg/L U(VI) solution as electrolyte.

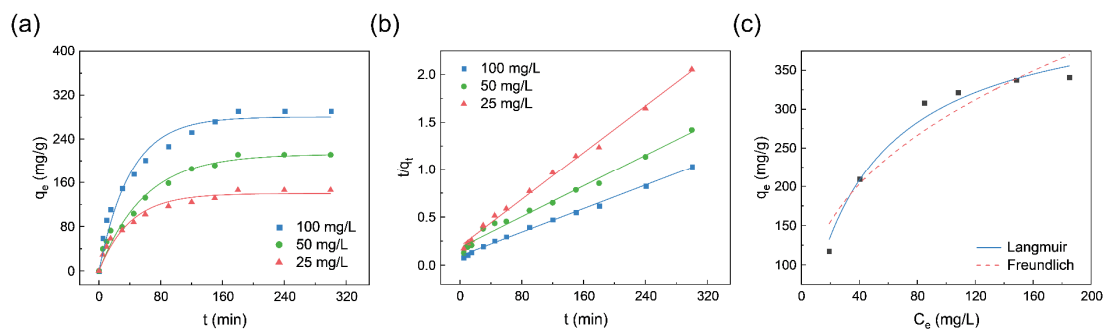

**Figure S9.** (a) Pseudo-first-order and (b) pseudo-second-order kinetics for uranium physicochemical adsorption of UiO-66-CN/GCA. (c) Physicochemical adsorption isotherms of UiO-66-CN/GCA.

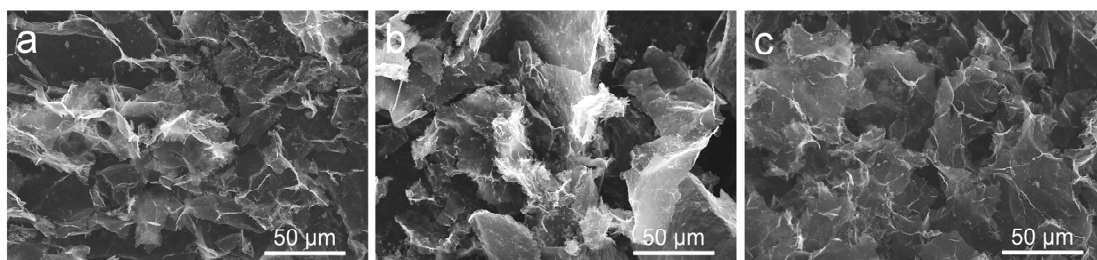

**Figure S10.** SEM images of UiO-66-CN/GCA (a) after the first desorption, (b) after the second desorption and (c) after the third desorption in three electrosorption/desorption cycles.



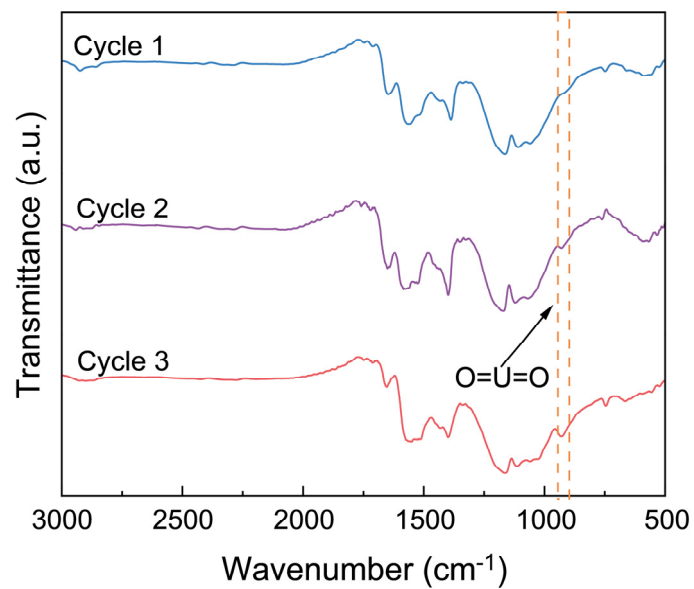

**Figure S11.** FTIR spectra of UiO-66-CN/GCA after each cycle of desorption in three electrosorption/desorption cycles.

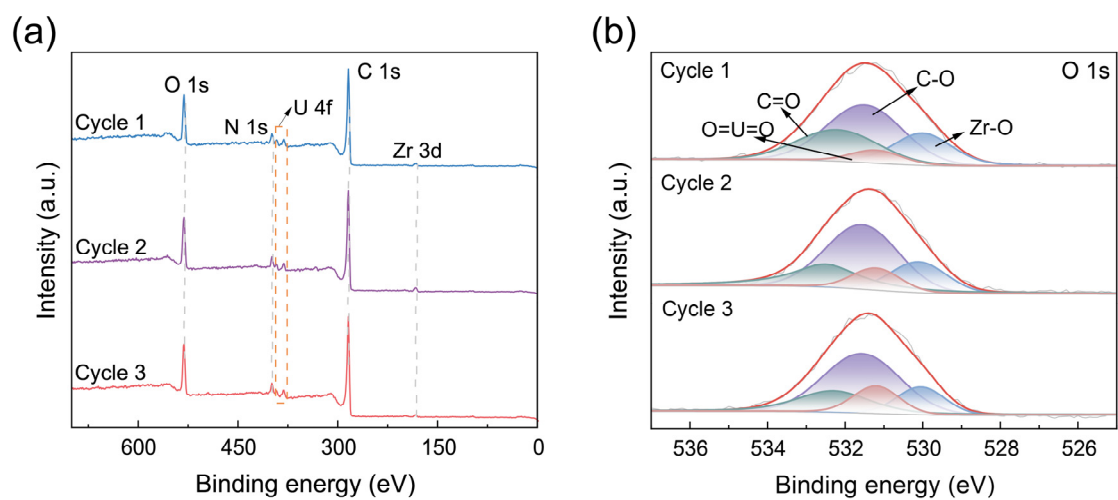

**Figure S12.** (a) XPS survey spectra and (b) XPS spectra of O 1s for UiO-66-CN/GCA after desorption in three electroadsorption/desorption cycles.

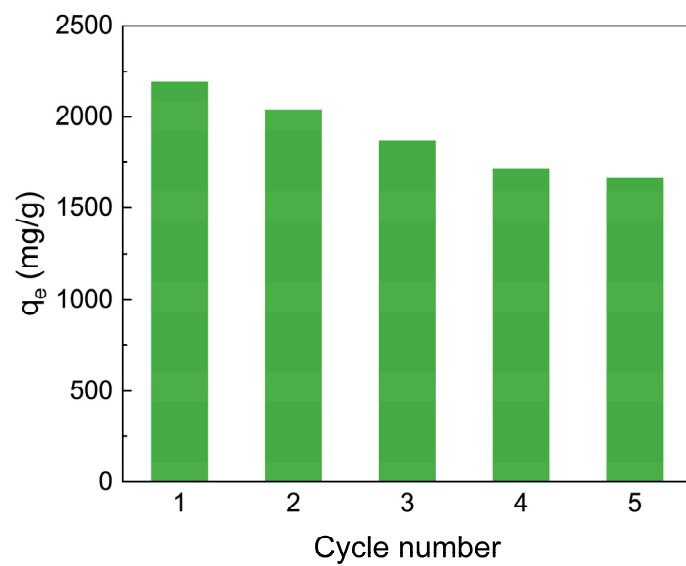

**Figure S13.** Reusability of UiO-66-CN/GCA in highly enriched uranium.

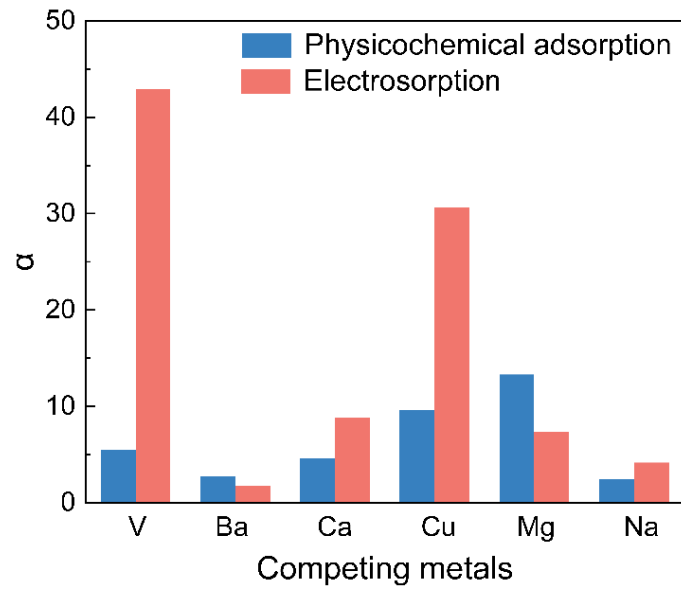

**Figure S14.** Selectivity coefficients for different metal ions in simulated water.

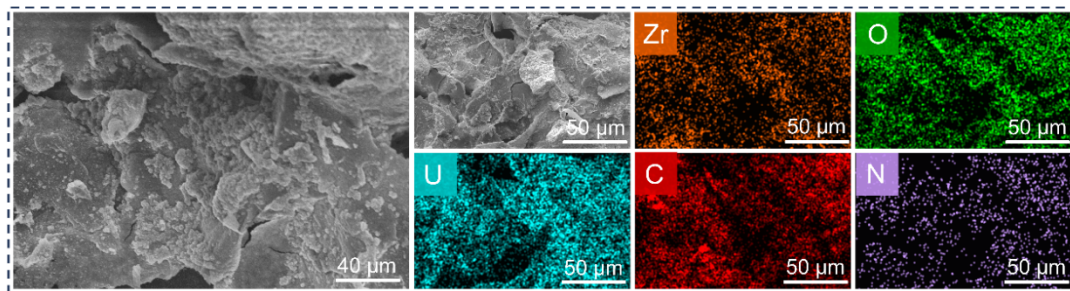

**Figure S15.** SEM images and EDS mapping of UiO-66-CN/GCA-U.

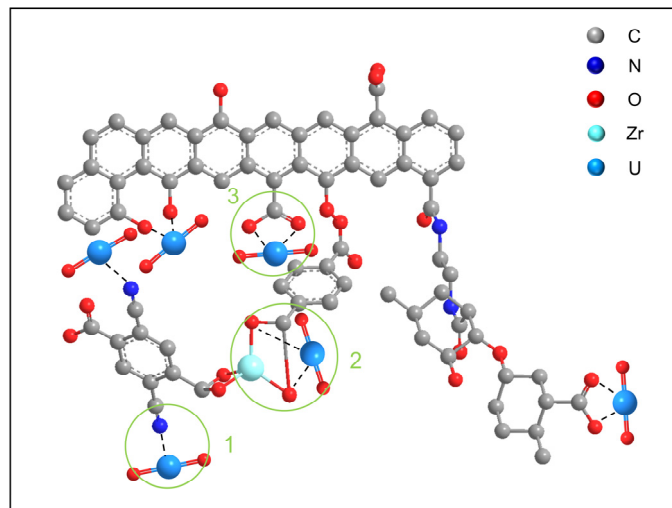

**Figure S16.** Adsorption mechanisms of UiO-66-CN/GCA.

**Table S1.** Material electrosorption uranium cost analysis.

| UiO-66-CN:GCA | $q_e$ (mg/g) | Cost (\$/mg-U) |
|---------------|--------------|----------------|
| 0:2.5         | 934.6        | 0.0299         |
| 0.2:2.5       | 1068.1       | 0.0589         |
| 0.5:2.5       | 1468.6       | 0.0783         |
| 1:2.5         | 1869.1       | 0.1043         |
| 2.5:2.5       | 2002.6       | 0.2297         |

**Table S2.** The proportions of different elements of UiO-66-CN/GCA by EDS.

| Elements | Mass (%) | Atom (%) |
|----------|----------|----------|
| C        | 61.43    | 68.90    |
| N        | 9.54     | 9.18     |
| O        | 25.40    | 21.38    |
| Zr       | 3.63     | 0.54     |



**Table S3.** Curve fitting results of C 1s XPS spectra.

| Samples | Peak    | Binding energy<br>(eV) | Area     | Relative<br>content (%) |
|---------|---------|------------------------|----------|-------------------------|
| GCA     | C-C/C=C | 284.80                 | 17105.60 | 64.99                   |
|         | C-O     | 286.31                 | 5772.16  | 21.93                   |
|         | O=C-O   | 288.40                 | 2417.97  | 9.18                    |
|         | C-N     | 285.80                 | 1020.87  | 3.90                    |
| UiO-66- | C-C/C=C | 284.80                 | 16228.25 | 56.08                   |
| CN/GCA  | C-O     | 286.00                 | 7214.18  | 24.94                   |
|         | O=C-O   | 288.60                 | 2684.93  | 9.28                    |
|         | C-N     | 285.80                 | 1110.50  | 3.84                    |
|         | C≡N     | 287.20                 | 1487.44  | 5.86                    |

**Table S4.** Relative ratios of elements determined from XPS.

| Materials     | Atomic ratio (%) |      |       |      |
|---------------|------------------|------|-------|------|
|               | C                | N    | O     | Zr   |
| GA            | 83.47            | 4.63 | 14.93 |      |
| UiO-66-CN     | 55.82            | 2.01 | 36.69 | 5.48 |
| UiO-66-CN/GCA | 78.60            | 6.17 | 14.93 | 0.30 |

**Table S5.** Porous structure parameters of GCA and UiO-66-CN/GCA.

| Adsorbent     | $S_{BET}$ (m <sup>2</sup> /g) | $V_{tot}$ (cm <sup>3</sup> /g) | $D_{ave}$ (nm) |
|---------------|-------------------------------|--------------------------------|----------------|
| GCA           | 12.7341                       | 0.024272                       | 12.8354        |
| UiO-66-CN/GCA | 45.7204                       | 0.040718                       | 11.9184        |

$S_{BET}$ : specific surface area     $V_{tot}$ : total pore volume     $D_{ave}$ : average pore diameter

**Table S6.** Parameters for kinetic models of U(VI) physicochemical adsorption by UiO-66-CN/GCA.

| Conditions | Pseudo-first-order         |                        | Pseudo-second-order                            |                        |
|------------|----------------------------|------------------------|------------------------------------------------|------------------------|
|            | Physicochemical adsorption |                        |                                                |                        |
| 25 mg/L    | $k_1$ (min <sup>-1</sup> ) | $2.491 \times 10^{-2}$ | $k_2$ (g·mg <sup>-1</sup> ·min <sup>-1</sup> ) | $1.966 \times 10^{-4}$ |
|            | $q_e$ (mg/g)               | 139.7                  | $q_e$ (mg/g)                                   | 162.3                  |
|            | $R^2$                      | 0.9636                 | $R^2$                                          | 0.9955                 |
| 50 mg/L    | $k_1$ (min <sup>-1</sup> ) | $1.713 \times 10^{-2}$ | $k_2$ (g·mg <sup>-1</sup> ·min <sup>-1</sup> ) | $9.065 \times 10^{-5}$ |
|            | $q_e$ (mg/g)               | 212.3                  | $q_e$ (mg/g)                                   | 247.5                  |
|            | $R^2$                      | 0.9693                 | $R^2$                                          | 0.9839                 |
| 100 mg/L   | $k_1$ (min <sup>-1</sup> ) | $2.457 \times 10^{-2}$ | $k_2$ (g·mg <sup>-1</sup> ·min <sup>-1</sup> ) | $9.930 \times 10^{-5}$ |
|            | $q_e$ (mg/g)               | 280.4                  | $q_e$ (mg/g)                                   | 324.7                  |
|            | $R^2$                      | 0.9628                 | $R^2$                                          | 0.9955                 |
|            | Electrosorption            |                        |                                                |                        |
| 25 mg/L    | $k_1$ (min <sup>-1</sup> ) | $3.617 \times 10^{-2}$ | $k_2$ (g·mg <sup>-1</sup> ·min <sup>-1</sup> ) | $8.321 \times 10^{-5}$ |
|            | $q_e$ (mg/g)               | 909.7                  | $q_e$ (mg/g)                                   | 724.6                  |
|            | $R^2$                      | 0.9697                 | $R^2$                                          | 0.9873                 |
| 50 mg/L    | $k_1$ (min <sup>-1</sup> ) | $4.419 \times 10^{-2}$ | $k_2$ (g·mg <sup>-1</sup> ·min <sup>-1</sup> ) | $7.681 \times 10^{-5}$ |
|            | $q_e$ (mg/g)               | 909.8                  | $q_e$ (mg/g)                                   | 1000.0                 |
|            | $R^2$                      | 0.9797                 | $R^2$                                          | 0.9923                 |
| 100 mg/L   | $k_1$ (min <sup>-1</sup> ) | $6.402 \times 10^{-2}$ | $k_2$ (g·mg <sup>-1</sup> ·min <sup>-1</sup> ) | $5.118 \times 10^{-5}$ |
|            | $q_e$ (mg/g)               | 1996.0                 | $q_e$ (mg/g)                                   | 2129.0                 |
|            | $R^2$                      | 0.9857                 | $R^2$                                          | 0.9949                 |

**Table S7.** Isotherm parameters for U(VI) electrosorption onto UiO-66-CN/GCA.

| Isotherm models | Parameters                          |                       |
|-----------------|-------------------------------------|-----------------------|
| Langmuir        | $q_{max}$ (mg/g)                    | 3092.3                |
|                 | $K_L$ (L/mg)                        | $1.47 \times 10^{-2}$ |
|                 | $R^2$                               | 0.9459                |
| Freundlich      | $1/n$                               | 0.4227                |
|                 | $K_f$ ((mg/g) L/mg <sup>1/n</sup> ) | 247.83                |
|                 | $R^2$                               | 0.8657                |

**Table S8.** Isotherm parameters for U(VI) physicochemical onto UiO-66-CN/GCA.

| Isotherm models | Parameters                          |                       |
|-----------------|-------------------------------------|-----------------------|
| Langmuir        | $q_{max}$ (mg/g)                    | 442.7                 |
|                 | $K_L$ (L/mg)                        | $2.21 \times 10^{-2}$ |
|                 | $R^2$                               | 0.9722                |
| Freundlich      | $1/n$                               | 0.3922                |
|                 | $K_f$ ((mg/g) L/mg <sup>1/n</sup> ) | 47.74                 |
|                 | $R^2$                               | 0.8822                |

**Table S9.** Comparison with other electric-adsorbents reported in previously reported works.

| Adsorbents             | Equilibrium time (h) | $q_{max}$ (mg/g) | Applied voltage (V) | Optimal pH | Actual environmental adsorption performance (mg/g) | adsorption capacity after five cycles (mg/g) | Reference |
|------------------------|----------------------|------------------|---------------------|------------|----------------------------------------------------|----------------------------------------------|-----------|
| CMPC                   | 5                    | 410.3            | 1.2                 | -          | -                                                  | 351.6                                        | [6]       |
| PEI/GOA                | 6                    | 419.7            | 1.2                 | 9          | -                                                  | 346.6                                        | [7]       |
| CMM                    | 5                    | 582.5            | 1.2                 | -          | -                                                  | -                                            | [8]       |
| BBC/PPy-3              | 1.5                  | 402.5            | 0.9                 | 4.5        | -                                                  | -                                            | [9]       |
| MoS <sub>2</sub> /GO-H | 4                    | 805.6            | 1.2                 | 5          | -                                                  | 700.8                                        | [10]      |
| CMP-0.10               | 1.6                  | 339.5            | 0.9                 | 4          | -                                                  | -                                            | [11]      |
| GO/PPy-0.2             | 2.5                  | 246.5            | 0.9                 | 4          | -                                                  | -                                            | [12]      |
| AGMM                   | 3                    | 831.5            | 1.5                 | 5          | -                                                  | 65.0                                         | [13]      |
| CC-AO                  | 12.5                 | 989.5            | 2.5                 | 2          | -                                                  | -                                            | [14]      |
| PA-PPy/CF              | 10                   | 1562.0           | 5.0                 | 5          | -                                                  | 709.6                                        | [15]      |
| F-TC                   | 23                   | 626.0            | 0.7                 | 5          | -                                                  | -                                            | [16]      |
| BSA@CFE                | 12.5                 | 2850.0           | 2.6                 | 6          | Seawater: 6.5                                      | 750.0                                        | [17]      |
| MCA                    | 1.5                  | 1826.4           | 1.0                 | 5          | Seawater: 13.82                                    | 1066.0                                       | [18]      |
| UiO-66-CN/GCA          | 1.5                  | 3092.3           | 1.2                 | 6          | Seawater: 110.1<br>Lakes and rivers: 23.0          | 1132.4                                       | This work |

**Table S10.** Relative elemental ratios of UiO-66-CN/GCA after each cycle as determined by XPS.

| Samples | Atomic ratio (%) |      |       |      |      |
|---------|------------------|------|-------|------|------|
|         | C                | N    | O     | Zr   | U    |
| Cycle 1 | 77.64            | 5.78 | 16.18 | 0.26 | 0.14 |
| Cycle 2 | 77.99            | 4.99 | 16.48 | 0.38 | 0.16 |
| Cycle 3 | 76.49            | 6.68 | 16.44 | 0.21 | 0.18 |



**Table S11.** Curve fitting results of O 1s XPS spectra of UiO-66-CN/GCA after desorption in three electrosorption/desorption cycles.

| Samples | Peak  | Binding energy<br>(eV) | Area     | Relative<br>content (%) |
|---------|-------|------------------------|----------|-------------------------|
| Cycle 1 | C-O   | 531.5                  | 9545.17  | 45.58                   |
|         | C=O   | 532.2                  | 5506.55  | 26.29                   |
|         | Zr-O  | 530.0                  | 4531.87  | 21.64                   |
|         | O=U=O | 531.2                  | 1359.08  | 6.49                    |
| Cycle 2 | C-O   | 531.56                 | 13226.28 | 48.68                   |
|         | C=O   | 532.5                  | 6275.98  | 23.10                   |
|         | Zr-O  | 530.1                  | 4780.93  | 17.59                   |
|         | O=U=O | 531.2                  | 2885.07  | 10.63                   |
| Cycle 3 | C-O   | 531.57                 | 14040.58 | 51.22                   |
|         | C=O   | 532.3                  | 5541.93  | 20.22                   |
|         | Zr-O  | 530.05                 | 4015.18  | 14.65                   |
|         | O=U=O | 531.2                  | 3813.46  | 13.91                   |

**Table S12.** Concentrations of each metal ion before and after adsorption of UiO-66-CN/GCA in simulated water.

| Metal | $C_0$ ( $\mu\text{g/L}$ ) | Physicochemical adsorption |              | Electrosorption           |              |
|-------|---------------------------|----------------------------|--------------|---------------------------|--------------|
|       |                           | $C_e$ ( $\mu\text{g/L}$ )  | $q_e$ (mg/g) | $C_e$ ( $\mu\text{g/L}$ ) | $q_e$ (mg/g) |
| U     | 301.6                     | 219.7                      | 40.9         | 250.1                     | 257.5        |
| V     | 206.8                     | 193.5                      | 6.6          | 205.9                     | 4.5          |
| Ba    | 288.3                     | 253.6                      | 17.3         | 260.9                     | 137.0        |
| Ca    | 336.3                     | 311.1                      | 12.6         | 329.3                     | 35.0         |
| Cu    | 231.0                     | 222.4                      | 4.3          | 229.6                     | 7.0          |
| Mg    | 268.7                     | 261.4                      | 3.6          | 262.0                     | 33.5         |
| Na    | 280.3                     | 243.0                      | 18.6         | 268.6                     | 58.5         |

**Table S13.** The distribution coefficient ( $K_d$ ) and selectivity coefficient ( $\alpha$ ) of UiO-66-CN/GCA for different metals in simulated seawater.

| Metal | Physicochemical adsorption |          | Electrosorption |          |
|-------|----------------------------|----------|-----------------|----------|
|       | $K_d$                      | $\alpha$ | $K_d$           | $\alpha$ |
| U     | 186.40                     | 1.00     | 1029.60         | 1.00     |
| V     | 34.10                      | 5.46     | 21.85           | 47.20    |
| Ba    | 68.41                      | 2.72     | 525.10          | 1.96     |
| Ca    | 40.50                      | 4.60     | 106.20          | 9.69     |
| Cu    | 19.33                      | 9.65     | 30.48           | 33.70    |
| Mg    | 13.96                      | 13.30    | 127.80          | 8.05     |
| Na    | 76.74                      | 2.43     | 223.90          | 4.59     |

**Table S14.** Uranium concentration before and after adsorption in different river and lake waters.

| Water samples     | $C_0$ ( $\mu\text{g/L}$ ) | $C_e$ ( $\mu\text{g/L}$ ) | $q_e$ (mg/g) |
|-------------------|---------------------------|---------------------------|--------------|
| Xiangmi Lake Park | 1.965                     | 1.757                     | 10.4         |
| Shigou Park       | 1.915                     | 1.572                     | 17.2         |
| Licun River       | 2.238                     | 2.594                     | 17.8         |
| Zhangcun River    | 2.867                     | 2.407                     | 23.0         |

## References

1. J. Wang, R. M. Wolf, J. W. Caldwell, P. A. Kollman and D. A. Case, *J. Comput. Chem.*, 2004, **25**, 1157-1174.
2. G. Bussi, D. Donadio and M. Parrinello, *J. Chem. Phys.*, 2007, **126**, 014101.
3. M. Parrinello and A. Rahman, *J. Appl. Phys.*, 1981, **52**, 7182-7190.
4. B. Hess, H. Bekker, H. J. C. Berendsen and J. G. E. M. Fraaije, *J. Comput. Chem.*, 1997, **18**, 1463-1472.
5. W. Humphrey, A. Dalke and K. Schulten, *J. Mol. Graph.*, 1996, **14**, 33-38.
6. Q. Hu, D. Wang, J. Liang, Z. Liu and J. Li, *Sep. Purif. Technol.*, 2024, **330**, 125494.
7. Q. Ren, Y. Wang, Y. Wang, Z. Feng, H. Jiang, Y. Liu, D. Yuan, C. Wang and Y. Li, *Sep. Purif. Technol.*, 2025, **352**, 128191.
8. Y. Zhang, J. Zhou, D. Wang, R. Cao and J. Li, *Chem. Eng. J.*, 2022, **430**, 132702.
9. H. Shehzad, M. T. Shuang, J. Chen, Z. Liu, A. Sharif, Z. H. Farooqi, E. Ahmed, R. Begum, L. Zhou, J. Ouyang, A. Irfan, A. R. Chaudhry, S. Shaukat and U. Hussain, *J. Environ. Chem. Eng.*, 2024, **12**, 111957.
10. Y. Liu, J. Zhao, T. Bo, R. Tian, Y. Wang, S. Deng, H. Jiang, Y. Liu, G. Lisak, M. Chang, X. Li and S. Zhang, *Small*, 2024, 2401374.
11. Y. Liu, L. Zhou, J. Ouyang, X. Ao, M. Shuang and A. A. Adesina, *Sep. Purif. Technol.*, 2024, **334**, 125989.
12. M. Shuang, L. Zhou, Y. Liu, H. Yu, X. Ao, J. Ouyang, Z. Liu, H. Shehzad and A. A. Adesina, *J. Environ. Chem. Eng.*, 2023, **11**, 111498.
13. W. Tang, D. Li, X. Zhang, F. Guo, C. Cui, M. Pan, D. Zhang, J. Li and X. Xu, *Sep. Purif. Technol.*, 2023, **319**, 124087.
14. M. Pan, C. Cui, W. W. Tang, Z. R. Guo, D. X. Zhang, X. Y. Xu and J. Y. Li, *Sep. Purif. Technol.*, 2022, **281**, 119843.
15. J. Huang, Z. Liu, D. Huang, T. Jin and Y. Qian, *J. Hazard. Mater.*, 2022, **433**, 128775.
16. P. Zhang, L. Wang, Z. Huang, J. Yu, Z. Li, H. Deng, T. Yin, L. Yuan, J. K. Gibson, L. Mei, L. Zheng, H. Wang, Z. Chai and W. Shi, *ACS Appl. Mater. Interfaces*, 2020, **12**, 15579-15587.
17. H. Ye, T. Li, Y. Huang, J. Jin, J. Fei, M. Wu and J. Yao, *Chem. Eng. J.*, 2023, **451**, 138615.
18. N. Shi, J. Wu, X. Zhi, N. Li and Z. Wang, *Chem. Eng. J.*, 2023, **476**, 146563.
